# Supplementary material for: Physicochemical, Rheological, and Nutritional Quality of Artisanal Fermented Milk Beverages with Cupuassu (Theobroma grandiflorum) Pulp and Flour
Source: MDPI journal article supplement (doi:10.3390/foods12112217), 2023-05-31
Supplement: s1 [file s1]

## Supplementary tables

**Table S1.** Optimism-corrected performance estimates through validation by bootstrap approach of significant models for prediction of physicochemical parameters from physicochemical variables in fermented milk beverage with cupuassu (*Theobroma grandiflorum*) pulp and flour and stored at 4 °C.

| Parameter      | Variable      | Equation                  | R      | R <sup>2</sup> <sub>adj</sub> | <i>p</i> | R <sup>2</sup> <sub>app</sub> | R <sup>2</sup> <sub>boot</sub> | R <sup>2</sup> <sub>orig</sub> | Optimi<br>sm | R <sup>2</sup> <sub>v</sub> | R <sub>v</sub> |
|----------------|---------------|---------------------------|--------|-------------------------------|----------|-------------------------------|--------------------------------|--------------------------------|--------------|-----------------------------|----------------|
| Storage period | n             | -0.002 <i>n</i> + 0.41    | -0.32  | 0.105                         | 0.012    | 0.548                         | -0.003                         | 0.551                          | 0.742        | 0.089                       | 0.298          |
|                | Pulp          |                           |        |                               |          |                               |                                |                                |              |                             |                |
|                | pH            | -0.03 pH + 4.47           | -0.740 | 0.548                         | <0.0001  | 0.363                         | 0.005                          | 0.358                          | 0.599        | 0.551                       | <b>0.742</b>   |
|                | Synereses     | -0.24 Syn + 34.53         | -0.480 | 0.230                         | 0.0001   | 0.230                         | 0.234                          | 0.230                          | 0.004        | 0.226                       | 0.475          |
|                | WHC           | 0.24 WHC + 65.46          | 0.480  | 0.231                         | 0.0001   | 0.231                         | 0.235                          | 0.231                          | 0.004        | 0.227                       | 0.476          |
| Flour          | <i>a</i> *    | 0.08 <i>a</i> * + 1.51    | 0.430  | 0.189                         | 0.001    | 0.189                         | 0.183                          | 0.188                          | -0.005       | 0.194                       | 0.440          |
|                | K             | 46.91 <i>K</i> + 237.9    | 0.630  | 0.391                         | <0.0001  | 0.391                         | 0.411                          | 0.391                          | 0.020        | 0.370                       | 0.609          |
|                | n             | -0.006 <i>n</i> + 0.42    | -0.410 | 0.167                         | 0.001    | 0.167                         | 0.179                          | 0.167                          | 0.013        | 0.154                       | 0.393          |
|                | App.viscosity | 16.73 μ + 68.31           | 0.530  | 0.278                         | <0.0001  | 0.278                         | 0.301                          | 0.278                          | 0.023        | 0.255                       | 0.505          |
|                | pH            | 0.08 pH + 4.180           | 0.6    | 0.364                         | <0.0001  | 0.364                         | 0.368                          | 0.364                          | 0.005        | 0.359                       | 0.599          |
|                | Synereses     | -1.05 Syn + 34.75         | -0.69  | 0.480                         | <0.0001  | 0.480                         | 0.486                          | 0.480                          | 0.006        | 0.474                       | <b>0.689</b>   |
|                | WHC           | 1.05 WHC + 65.25          | 0.69   | 0.478                         | <0.0001  | 0.478                         | 0.485                          | 0.478                          | 0.006        | 0.472                       | <b>0.687</b>   |
|                | <i>L</i> *    | -7.011 <i>L</i> * + 32.83 | -0.86  | 0.746                         | <0.0001  | 0.746                         | 0.740                          | 0.746                          | -0.006       | 0.752                       | <b>0.867</b>   |
|                | <i>a</i> *    | -0.19 <i>a</i> * + 2.238  | -0.36  | 0.133                         | 0.004    | 0.133                         | 0.159                          | 0.133                          | 0.027        | 0.106                       | 0.326          |
|                | <i>b</i> *    | -9.52 <i>b</i> * + 17.20  | -0.32  | 0.101                         | 0.013    | 0.101                         | 0.291                          | 0.101                          | 0.190        | -0.088                      | NA             |
|                | <i>c</i> *    | -7.82 <i>c</i> * + 22.46  | -0.87  | 0.751                         | <0.0001  | 0.751                         | 0.745                          | 0.750                          | -0.005       | 0.756                       | <b>0.869</b>   |
|                | <i>h</i> °    | 74.01 <i>h</i> ° + 122.1  | 0.86   | 0.747                         | <0.0001  | 0.747                         | 0.742                          | 0.747                          | -0.005       | 0.753                       | <b>0.868</b>   |
| pH             | <i>L</i> *    | -33.49 <i>L</i> * + 166.2 | -0.53  | 0.28                          | <0.0001  | 0.280                         | 0.290                          | 0.280                          | 0.011        | 0.269                       | 0.519          |
|                | <i>a</i> *    | -2.216 <i>a</i> * + 11.47 | -0.53  | 0.283                         | <0.0001  | 0.283                         | 0.286                          | 0.283                          | 0.003        | 0.280                       | 0.529          |
|                | <i>c</i> *    | -36.26 <i>c</i> * + 166.5 | -0.52  | 0.266                         | <0.0001  | 0.266                         | 0.275                          | 0.265                          | 0.010        | 0.256                       | 0.505          |
|                | <i>h</i> °    | 353.1 <i>h</i> ° - 1284   | 0.53   | 0.280                         | <0.0001  | 0.280                         | 0.289                          | 0.280                          | 0.009        | 0.271                       | 0.520          |
|                | K             | -696.4 <i>K</i> + 3493    | -0.39  | 0.155                         | 0.002    | 0.155                         | 0.172                          | 0.155                          | 0.017        | 0.139                       | 0.373          |
|                | n             | 0.096 <i>n</i> - 0.02654  | 0.27   | 0.075                         | 0.034    | 0.075                         | 0.094                          | 0.075                          | 0.019        | 0.057                       | 0.238          |
|                | App.viscosity | -270.8 μ + 1326           | -0.36  | 0.132                         | 0.004    | 0.132                         | 0.146                          | 0.131                          | 0.015        | 0.117                       | 0.342          |
| Synereses      | WHC           | -0.9994 WHC + 99.98       | -1     | 1                             | <0.001   | 0.997                         | 0.997                          | 0.997                          | 0.000        | 0.997                       | <b>0.998</b>   |

|                    |           |                               |       |       |         |       |       |        |       |        |              |
|--------------------|-----------|-------------------------------|-------|-------|---------|-------|-------|--------|-------|--------|--------------|
| WHC                | $L^*$     | $2.714 L^* - 67.72$           | 0.51  | 0.26  | <0.001  | 0.256 | 0.258 | 0.256  | 0.002 | 0.254  | 0.504        |
|                    | $c^*$     | $3.015 c^* - 89.31$           | 0.51  | 0.26  | <0.001  | 0.256 | 0.258 | 0.256  | 0.002 | 0.253  | 0.503        |
|                    | $h^\circ$ | $-27.68 h^\circ + 1152$       | -0.49 | 0.24  | <0.001  | 0.240 | 0.243 | 0.239  | 0.003 | 0.236  | 0.486        |
|                    | $L^*$     | $-2.70 L^* + 203.0$           | -0.5  | 0.255 | <0.0001 | 0.255 | 0.256 | 0.255  | 0.002 | 0.253  | 0.503        |
|                    | $c^*$     | $-3.008 c^* + 211.7$          | -0.5  | 0.255 | <0.0001 | 0.255 | 0.257 | 0.255  | 0.003 | 0.252  | 0.502        |
|                    | $h^\circ$ | $27.63 h^\circ - 1613$        | 0.49  | 0.239 | <0.0001 | 0.239 | 0.242 | 0.239  | 0.004 | 0.235  | 0.485        |
|                    | $L^*$     | $0.02459 a^* + 1.397$         | 0.37  | 0.140 | 0.003   | 0.140 | 0.178 | 0.140  | 0.038 | 0.102  | 0.319        |
|                    | $b^*$     | $1.670 b^* - 34.34$           | 0.45  | 0.205 | 0.0003  | 0.205 | 0.437 | 0.205  | 0.232 | -0.027 | NA           |
|                    | $c^*$     | $1.109 c^* - 14.02$           | 1     | 0.994 | <0.0001 | 0.994 | 0.994 | 0.994  | 0.000 | 0.994  | <b>0.997</b> |
|                    | $h^\circ$ | $-10.51 h^\circ + 467.8$      | -1    | 0.994 | <0.0001 | 0.994 | 0.994 | 0.994  | 0.000 | 0.993  | <b>0.997</b> |
| $a^*$              | $c^*$     | $6.64 c^* - 2.19$             | 0.39  | 0.154 | 0.002   | 0.154 | 0.192 | 0.153  | 0.039 | 0.115  | 0.340        |
|                    | $h^\circ$ | $-65.83 h^\circ + 361.2$      | -0.41 | 0.169 | 0.001   | 0.169 | 0.204 | 0.167  | 0.036 | 0.132  | 0.364        |
| $b^*$              | $c^*$     | $0.135 c^* + 10.33$           | 0.45  | 0.201 | <0.001  | 0.201 | 0.436 | -0.249 | 0.685 | -0.484 | NA           |
|                    | $h^\circ$ | $-1.270 h^\circ + 236.8$      | -0.44 | 0.197 | <0.001  | 0.197 | 0.432 | -0.255 | 0.687 | -0.490 | NA           |
| $c^*$              | $h^\circ$ | $-9.475 h^\circ + 334.8$      | -1    | 0.998 | <0.001  | 0.998 | 0.998 | 0.998  | 0.000 | 0.998  | 0.999        |
| K                  | Syneresis | $-0.0018 \text{ Syn} + 34.09$ | -0.27 | 0.075 | 0.03    | 0.075 | 0.086 | 0.074  | 0.012 | 0.063  | 0.250        |
|                    | WHC       | $0.0019 \text{ WHC} + 65.89$  | 0.28  | 0.076 | 0.03    | 0.076 | 0.088 | 0.076  | 0.012 | 0.064  | 0.253        |
| n                  | K         | $-3998 K + 2047$              | -0.79 | 0.630 | <0.001  | 0.630 | 0.641 | 0.630  | 0.012 | 0.618  | <b>0.786</b> |
|                    | K         | $2.283 K + 131.0$             | 0.97  | 0.932 | <0.001  | 0.932 | 0.933 | 0.931  | 0.002 | 0.930  | <b>0.964</b> |
| Apparent viscosity | n         | $-0.0003748 n + 0.447$        | -0.8  | 0.638 | <0.001  | 0.638 | 0.651 | -0.373 | 1.024 | -0.387 | NA           |

WHC: Water holding capacity;  $L^*$ : lightness;  $a^*$ : redness;  $b^*$ : yellowness;  $c^*$ : chroma;  $h^\circ$ : hue angle; K: consistency index; n: flow behavior index; App.viscosity: Apparent viscosity(mPa s); R: Pearson's correlation coefficient;  $R^2_{\text{adj}}$ : adjusted coefficient of determination;  $p$ : probability value;  $R^2_{\text{app}}$ : apparent coefficient of determination;  $R^2_{\text{boot}}$ : bootstrap coefficient of determination;  $R^2_{\text{orig}}$ : original coefficient of determination;  $R^2_{\text{v}}$ : coefficient of determination of the model after validation. Rv: correlation coefficient of the model after validation.

**Table S2.** Optimism-corrected performance estimates through validation by bootstrap approach of significant models for prediction of sensory parameters from physicochemical variables in fermented milk beverage with cupuassu (*Theobroma grandiflorum*) pulp and flour and stored at 4 °C.

| Sensory parameter | Variable      | Equation                   | R     | R <sup>2</sup> <sub>adj</sub> | <i>p</i> | R <sup>2</sup> <sub>app</sub> | R <sup>2</sup> <sub>boot</sub> | R <sup>2</sup> <sub>orig</sub> | Optimism | R <sup>2</sup> <sub>v</sub> | R <sub>v</sub> |
|-------------------|---------------|----------------------------|-------|-------------------------------|----------|-------------------------------|--------------------------------|--------------------------------|----------|-----------------------------|----------------|
| Appearance        | Flour         | 0.67 Flour + 4.53          | 0.85  | 0.725                         | 0.032    | 0.720                         | 0.762                          | 0.7224                         | 0.039    | 0.681                       | 0.825          |
|                   | Syneresis     | -0.29 Syn + 15.31          | -0.87 | 0.757                         | 0.024    | 0.760                         | 0.821                          | 0.748                          | 0.073    | 0.687                       | 0.829          |
|                   | WHC           | 0.29 WHC - 13.58           | 0.87  | 0.755                         | 0.025    | 0.760                         | 0.820                          | 0.745                          | 0.076    | 0.684                       | 0.827          |
| Color             | Flour         | 0.81 Flour + 4.26          | 0.94  | 0.89                          | 0.005    | 0.890                         | 0.899                          | 0.8856                         | 0.013    | 0.877                       | 0.936          |
|                   | Syneresis     | -0.32 Syn + 16.31          | -0.88 | 0.777                         | 0.020    | 0.780                         | 0.843                          | 0.763                          | 0.080    | 0.700                       | 0.837          |
|                   | WHC           | 0.32 WHC - 15.55           | 0.88  | 0.774                         | 0.021    | 0.770                         | 0.842                          | 0.760                          | 0.082    | 0.688                       | 0.829          |
| Flavor            | Flour         | 0.34 Flour + 5.49          | 0.83  | 0.695                         | 0.039    | 0.690                         | 0.740                          | 0.6943                         | 0.046    | 0.644                       | 0.803          |
|                   | Syneresis     | -0.15 Syn + 10.91          | -0.86 | 0.743                         | 0.027    | 0.740                         | 0.801                          | 0.739                          | 0.063    | 0.677                       | 0.823          |
|                   | WHC           | 0.1451WHC - 3.625          | 0.86  | 0.740                         | 0.028    | 0.740                         | 0.800                          | 0.735                          | 0.064    | 0.676                       | 0.822          |
| Alcoholic(JAR)    | Pulp          | 0.02780 Pulp + 2.942       | 0.85  | 0.714                         | 0.034    | 0.710                         | 0.717                          | 0.7083                         | 0.009    | 0.701                       | 0.837          |
|                   | <i>b</i> *    | -0.3603 <i>b</i> * + 2.297 | -0.88 | 0.781                         | 0.020    | 0.780                         | 0.789                          | 0.775                          | 0.014    | 0.766                       | 0.875          |
| Cupuassu JAR      | pH            | -1.488 pH + 9.356          | -0.93 | 0.871                         | 0.007    | 0.870                         | 0.733                          | 0.833                          | -0.100   | 0.970                       | 0.985          |
|                   | <i>L</i> *    | 0.2730 <i>L</i> * - 1.093  | 0.87  | 0.756                         | 0.025    | 0.760                         | 0.728                          | 0.742                          | -0.014   | 0.774                       | 0.880          |
| Sweet JAR         | Flour         | -0.2736 Flour + 2.591      | -0.89 | 0.788                         | 0.018    | 0.790                         | 0.793                          | 0.7851                         | 0.008    | 0.782                       | 0.884          |
| Bitter(JAR)       | Flour         | 0.2769 Flour + 2.929       | 0.94  | 0.875                         | 0.006    | 0.870                         | 0.879                          | 0.8702                         | 0.009    | 0.861                       | 0.928          |
|                   | Syneresis     | -0.1020 Syn + 6.811        | -0.82 | 0.670                         | 0.047    | 0.670                         | 0.753                          | 0.658                          | 0.095    | 0.575                       | 0.758          |
|                   | WHC           | 0.1014 WHC - 3.348         | 0.82  | 0.668                         | 0.047    | 0.670                         | 0.753                          | 0.654                          | 0.098    | 0.572                       | 0.756          |
| White(JAR)        | Flour         | -0.2438 Flour + 3.398      | -0.97 | 0.934                         | 0.002    | 0.930                         | 0.932                          | 0.9319                         | 0.000    | 0.930                       | 0.964          |
|                   | Syneresis     | 0.1014 Syn - 0.3917        | 0.96  | 0.912                         | 0.003    | 0.910                         | 0.935                          | 0.907                          | 0.028    | 0.882                       | 0.939          |
|                   | WHC           | -0.1009 WHC + 9.714        | -0.95 | 0.910                         | 0.003    | 0.910                         | 0.935                          | 0.905                          | 0.030    | 0.880                       | 0.938          |
| Brown(JAR)        | Flour         | 0.2878 Flour + 2.202       | 0.96  | 0.930                         | 0.002    | 0.930                         | 0.935                          | 0.9276                         | 0.007    | 0.923                       | 0.961          |
|                   | Syneresis     | -0.1108 Syn + 6.391        | -0.88 | 0.777                         | 0.020    | 0.780                         | 0.822                          | 0.769                          | 0.053    | 0.727                       | 0.853          |
|                   | WHC           | 0.1101 WHC - 4.643         | 0.88  | 0.775                         | 0.021    | 0.770                         | 0.821                          | 0.766                          | 0.055    | 0.715                       | 0.846          |
| Cupuassu(JAR)     | Pulp          | 0.06890 Pulp + 2.644       | 0.84  | 0.708                         | 0.036    | 0.710                         | 0.735                          | 0.7044                         | 0.031    | 0.679                       | 0.824          |
|                   | <i>c</i> *    | 1.785 <i>c</i> * - 2.060   | 0.9   | 0.805                         | 0.015    | 0.810                         | 0.793                          | 0.804                          | -0.011   | 0.821                       | 0.906          |
| Mouthfeel (JAR)   | <i>a</i> *    | -0.7049 <i>a</i> * + 3.856 | -0.83 | 0.691                         | 0.040    | 0.690                         | 0.702                          | 0.674                          | 0.028    | 0.662                       | 0.813          |
|                   | K             | 0.0001972 K + 2.500        | 0.94  | 0.879                         | 0.006    | 0.880                         | 0.800                          | -1.180                         | 1.980    | -1.100                      | NA             |
|                   | App.viscosity | 0.0004728 $\mu$ + 2.518    | 0.9   | 0.810                         | 0.015    | 0.810                         | 0.707                          | 0.627                          | 0.080    | 0.730                       | 0.854          |

WHC: Water holding capacity;  $L^*$ : lightness;  $a^*$ : redness;  $b^*$ : yellowness;  $c^*$ : chroma;  $h^\circ$ : hue angle; K: consistency index; n: flow behavior index; App.viscosity: Apparent viscosity(mPa s); R: Pearson's correlation coefficient;  $R^2_{adj}$ : adjusted coefficient of determination;  $p$ : probability value;  $R^2_{app}$ : apparent coefficient of determination;  $R^2_{boot}$ : bootstrap coefficient of determination;  $R^2_{orig}$ : original coefficient of determination;  $R^2_v$ : coefficient of determination of the model after validation.  $R_v$ : correlation coefficient of the model after validation

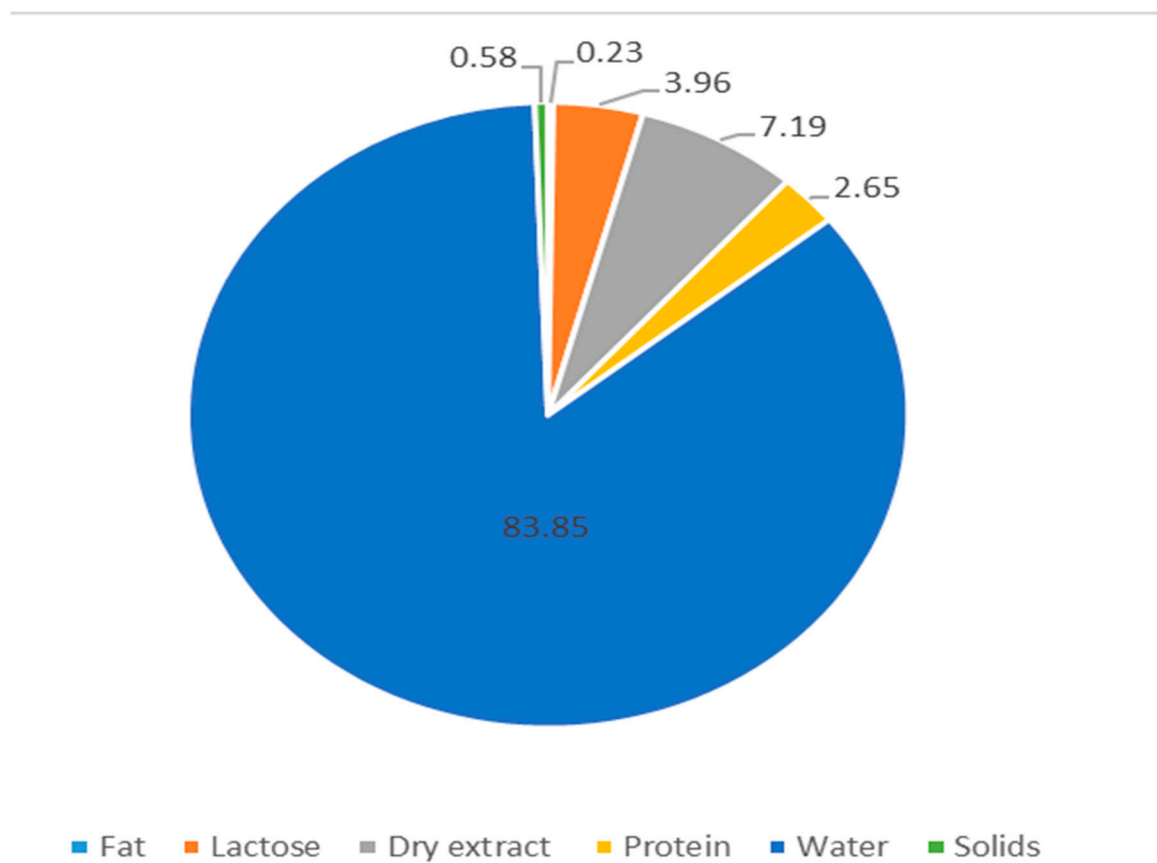

**Figure S1.** Proximal composition of whey used to prepare artisanal fermented milk beverages.

### Supplementary figures

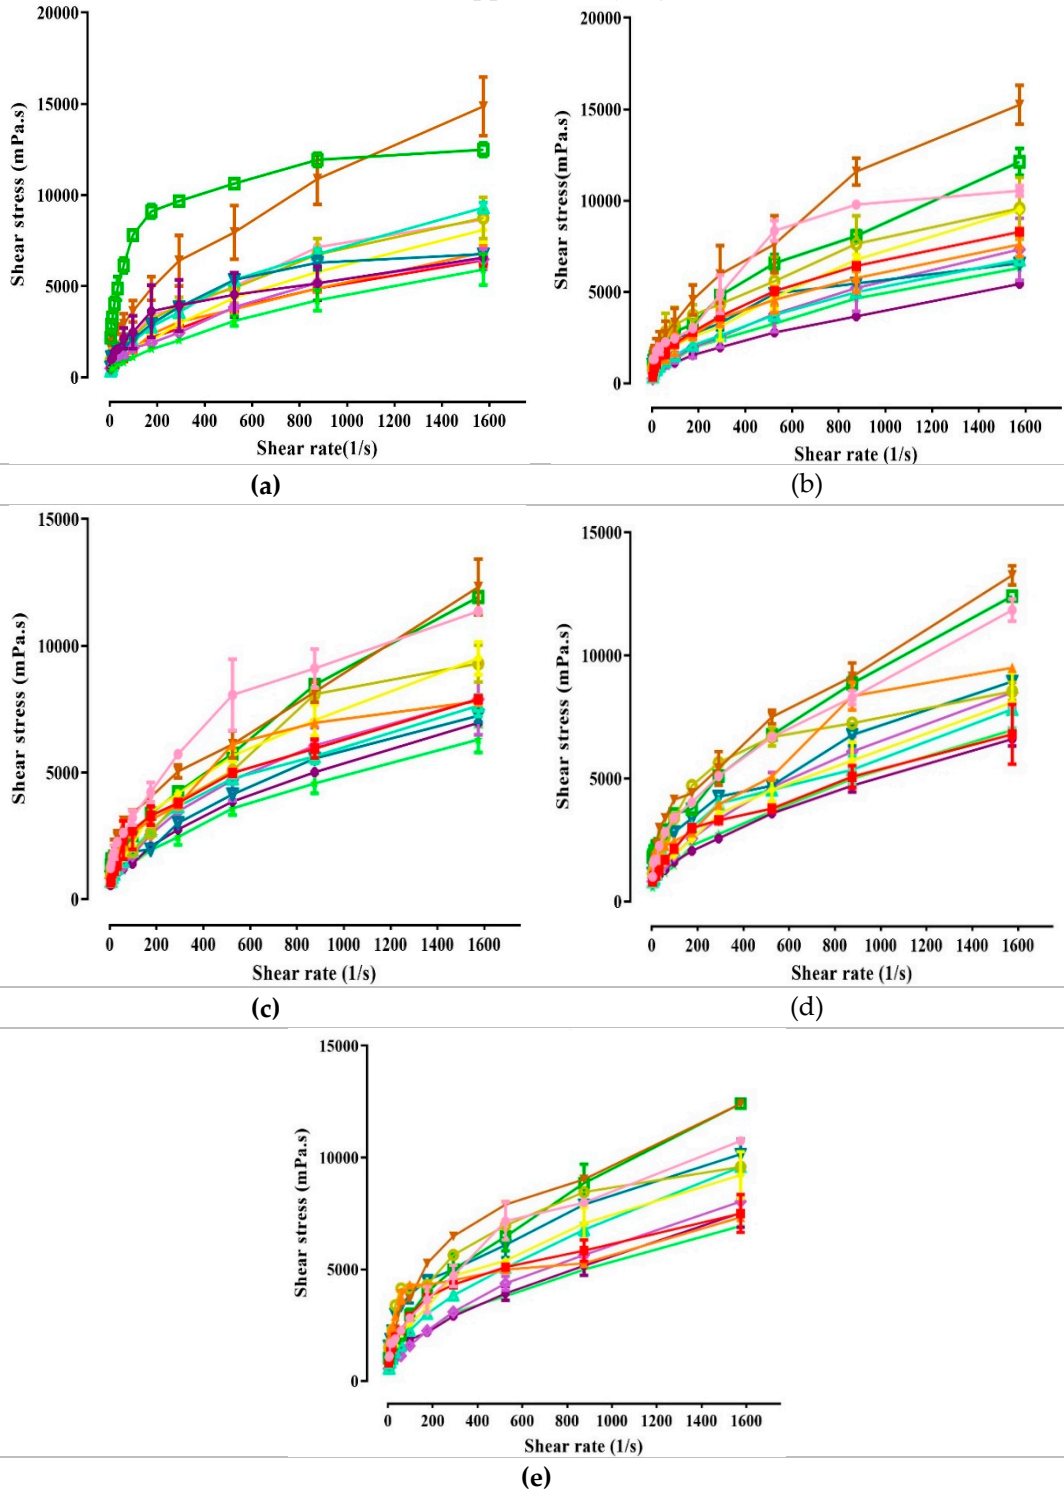

**Figure S2.** Effect of shear rate on shear stress of fermented milk beverage : (●) 10% pulp, (■) 5% pulp, (▲) 7.5% pulp, (◆) 10% pulp and 3% flour, (◇) 5% pulp and 3% flour, (◊) 7.5% pulp and 3% flour, (◑) 10% pulp and 1.5% flour, (◒) 5% pulp and 3% flour, (◓) 7.5% pulp and 3% flour, (◔) control, (◕) 3% flour, (◖) 1.5% flour during storage a) day 0; b) day 7; c) day 14; d) day 21 and e) day 28.

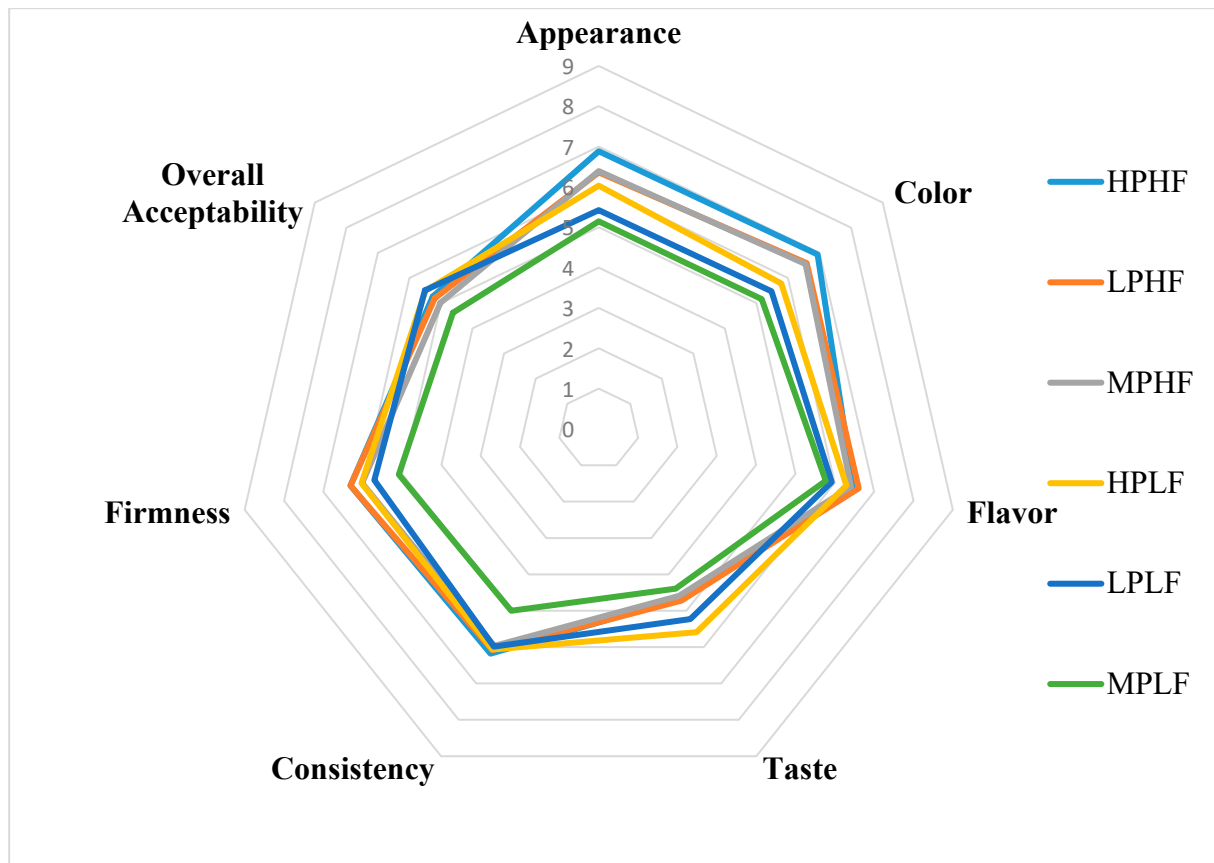

**Figure S3.** Spider plot of mean scores of sensory evaluation of fermented milk beverage with cupuassu flour and pulp. HPHF, beverage (10% pulp and 3% flour); LPHF, beverage (5% pulp and 3% flour); MPHF, beverage (7.5% pulp and 3% flour); HPLF, beverage (10% pulp and 1.5% flour); LPLF, beverage (5% pulp and 1.5% flour); MPLF, beverage (7.5% pulp and 1.5% flour).

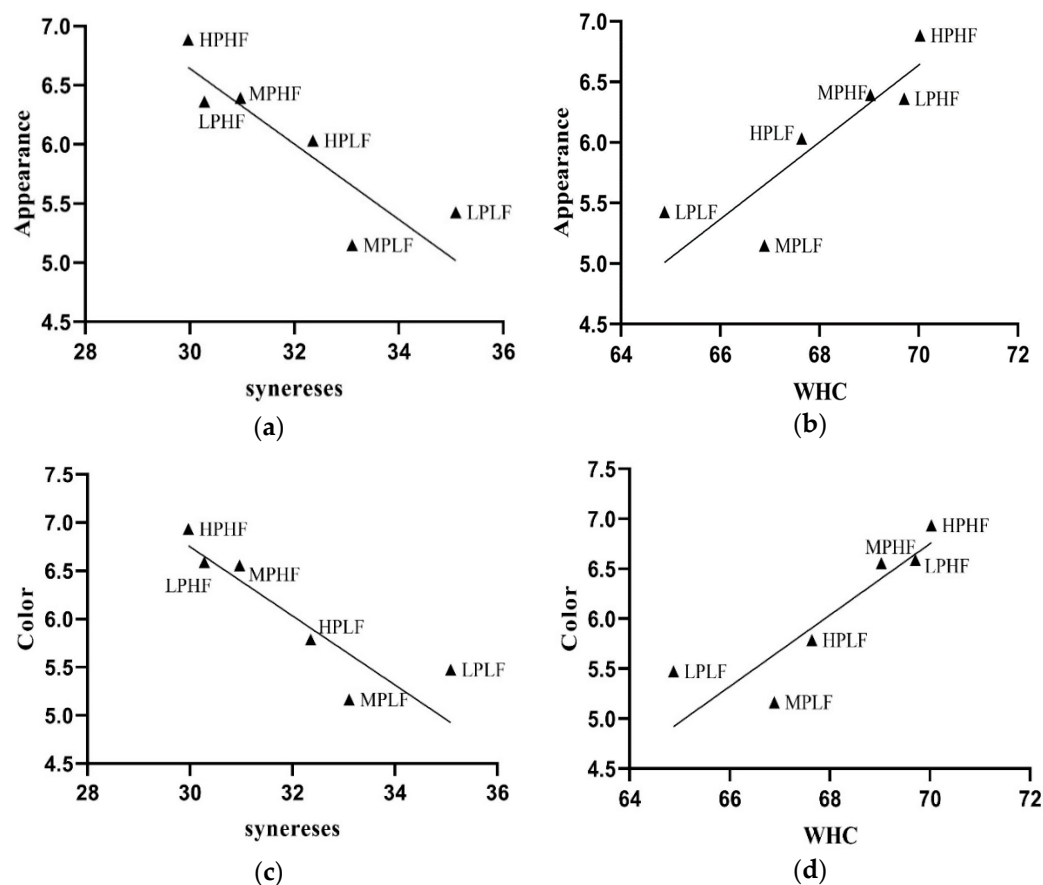

**Figure S4.** Significant correlations ( $p < 0.05$ ) and internally validated by Bootstrap method of sensory attributes in relation to physicochemical parameters of fermented milk beverages stored at 4 °C. a) Appearance: syneresis; b) Appearance: water holding capacity (WHC); c) color: syneresis; d) color: water holding capacity (WHC).



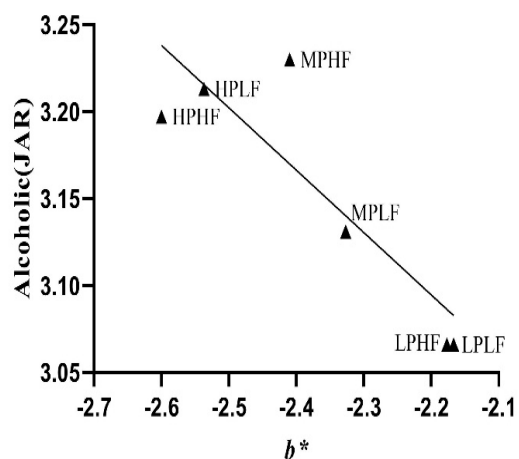

(a)

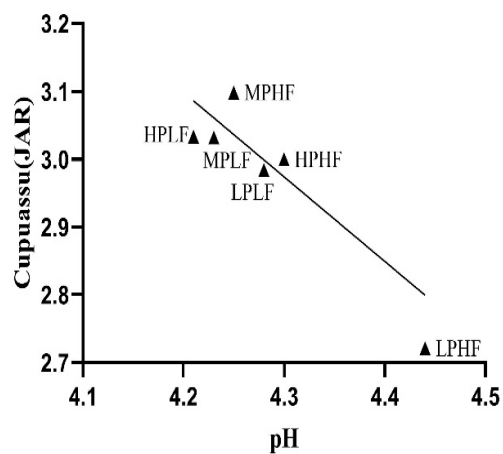

(b)

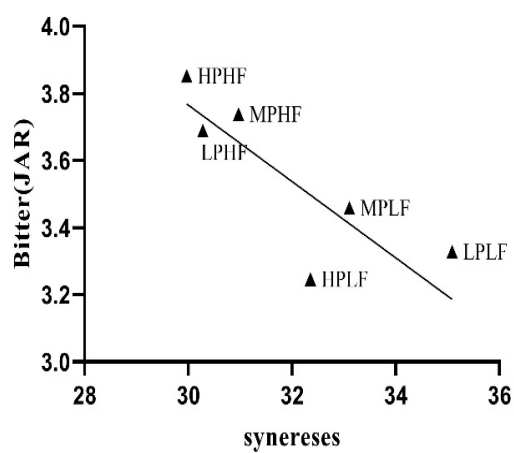

(c)

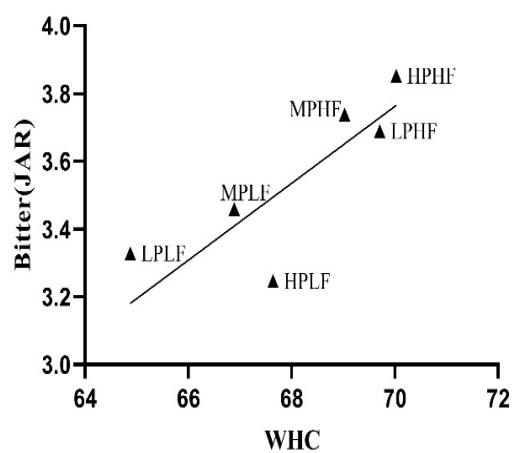

(d)

**Figure S5.** Significant correlations ( $p < 0.05$ ) and internally validated by Bootstrap method of sensory attributes in relation to physicochemical parameters of fermented milk beverages stored at 4 °C. a) Alcoholic (JAR):  $b^*$ ; b) cupuassu (JAR): pH; c) Bitter (JAR): syneresis; d) Bitter (JAR): water holding capacity (WHC).

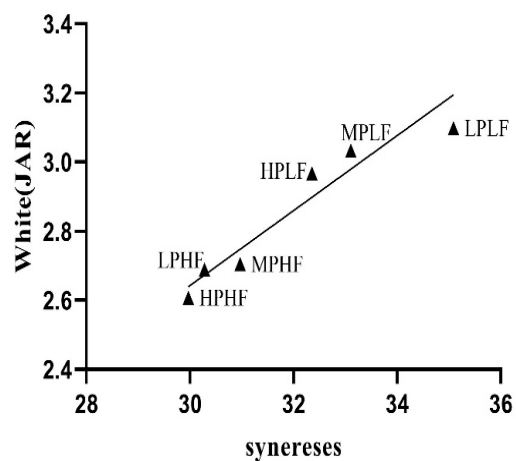

(a)

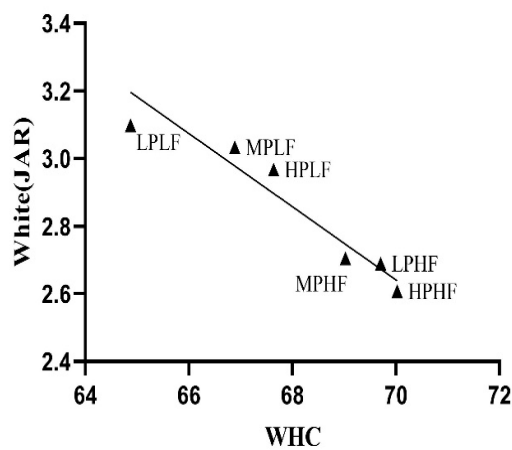

(b)

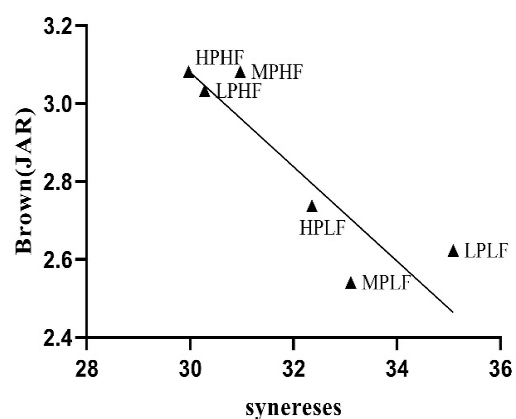

(c)

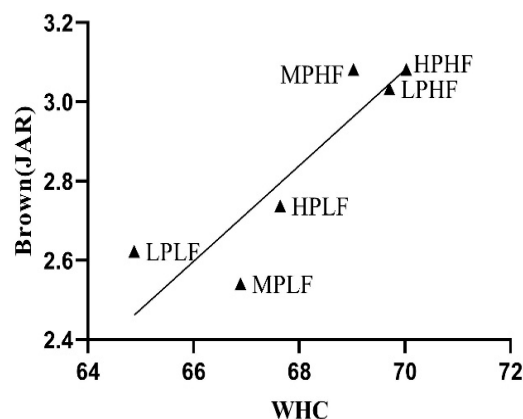

(d)

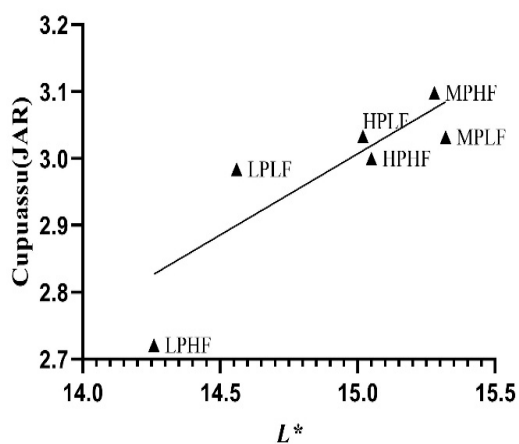

(e)

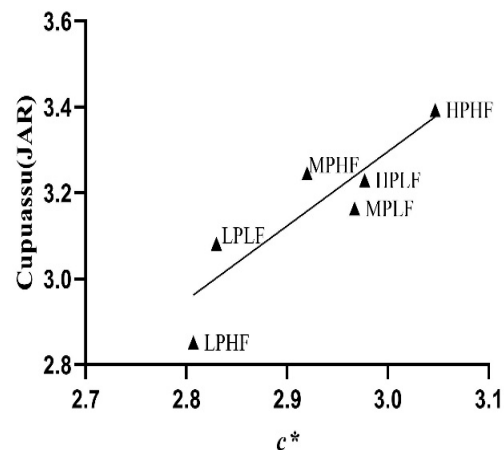

(f)

**Figure S6.** Significant correlations ( $p < 0.05$ ) and internally validated by Bootstrap method of sensory attributes in relation to physicochemical parameters of fermented milk beverages stored at 4 °C. a) White (JAR): syneresis; b) White (JAR): water holding capacity (WHC); c) Brown (JAR): syneresis; d) Brown (JAR): water holding capacity (WHC); e) Cupuassu (JAR):  $L^*$ ; f) Cupuassu (JAR):  $c^*$ .

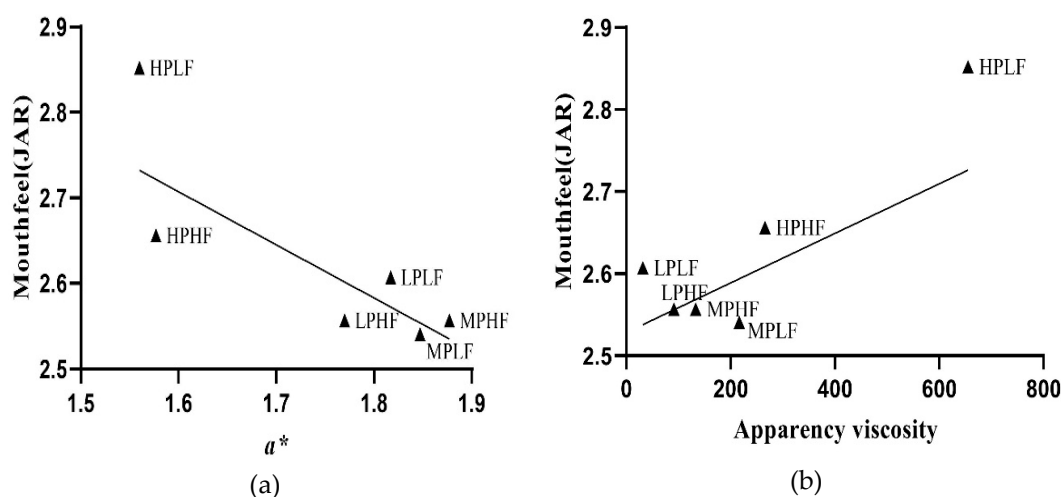

**Figure S7.** Significant correlations ( $p < 0.05$ ) and internally validated by Bootstrap method of sensory attributes in relation to physicochemical parameters of fermented milk beverages stored at 4 °C. a) Mouthfeel (JAR):  $a^*$ ; b) Mouthfeel (JAR): Apparency viscosity.
